# Supplementary material
Source: PubMed Central journal article supplement (PMC2996012)
Supplement: pp.110.162990_1.pdf [file pp.110.162990_1.pdf]

**Figure S1**

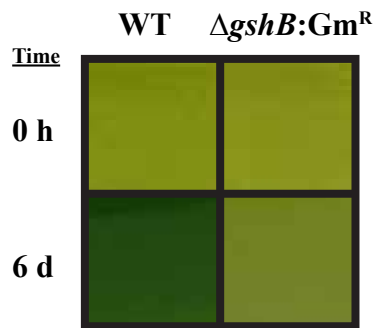

**Supplemental Figure 1.** Visual comparison of WT and the  $\Delta gshB::Gm^R$  strains during recovery from sulfate depletion. Cells were transferred from sulfate deplete media into fresh BG11 containing 303  $\mu$ M sulfate (0 h) and grown for 6 days.
